# Supplementary material for: Polymerization Kinetics of Acrylic Photopolymer Loaded with Graphene-Based Nanomaterials for Additive Manufacturing
Source: MDPI journal article supplement (doi:10.3390/nano12244498), 2022-12-19
Supplement: s1 [file s1]

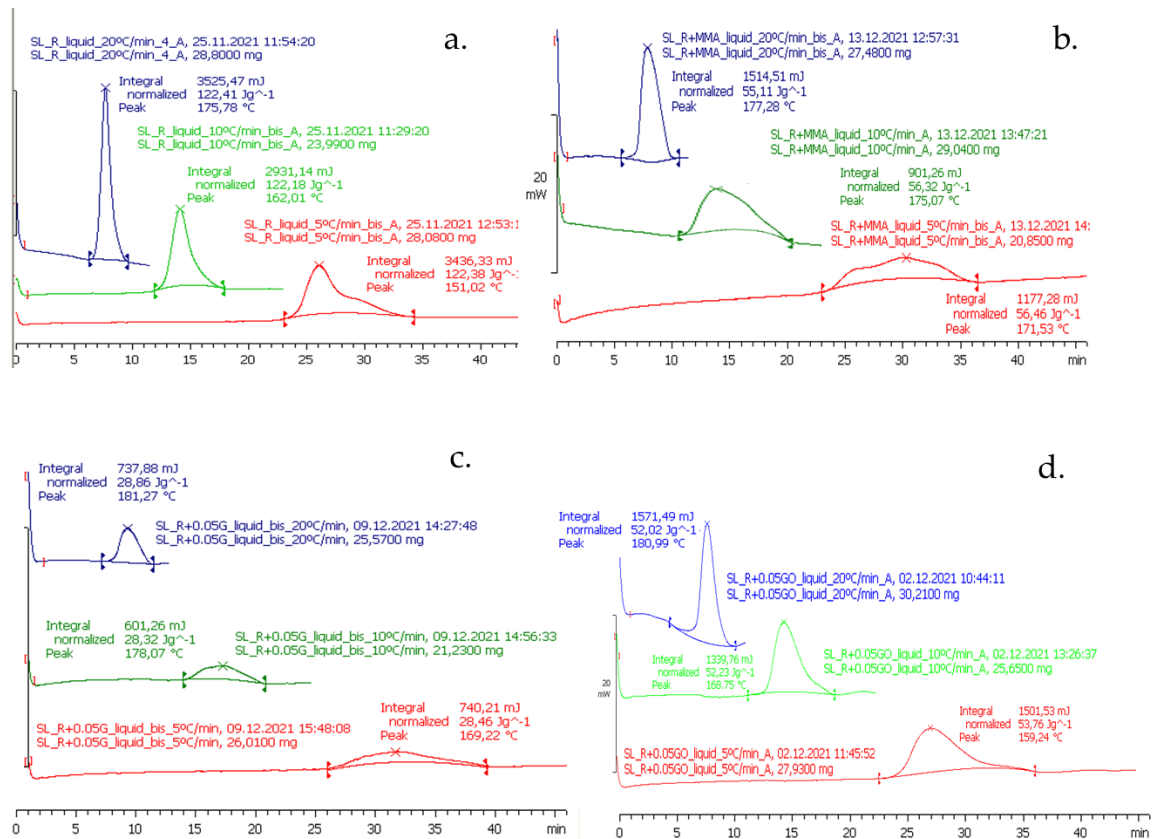

**Figure S1.** Thermograms of thermally-triggered polymerization of R (a), R' (b), R'+G (c) and R'+GO (d)

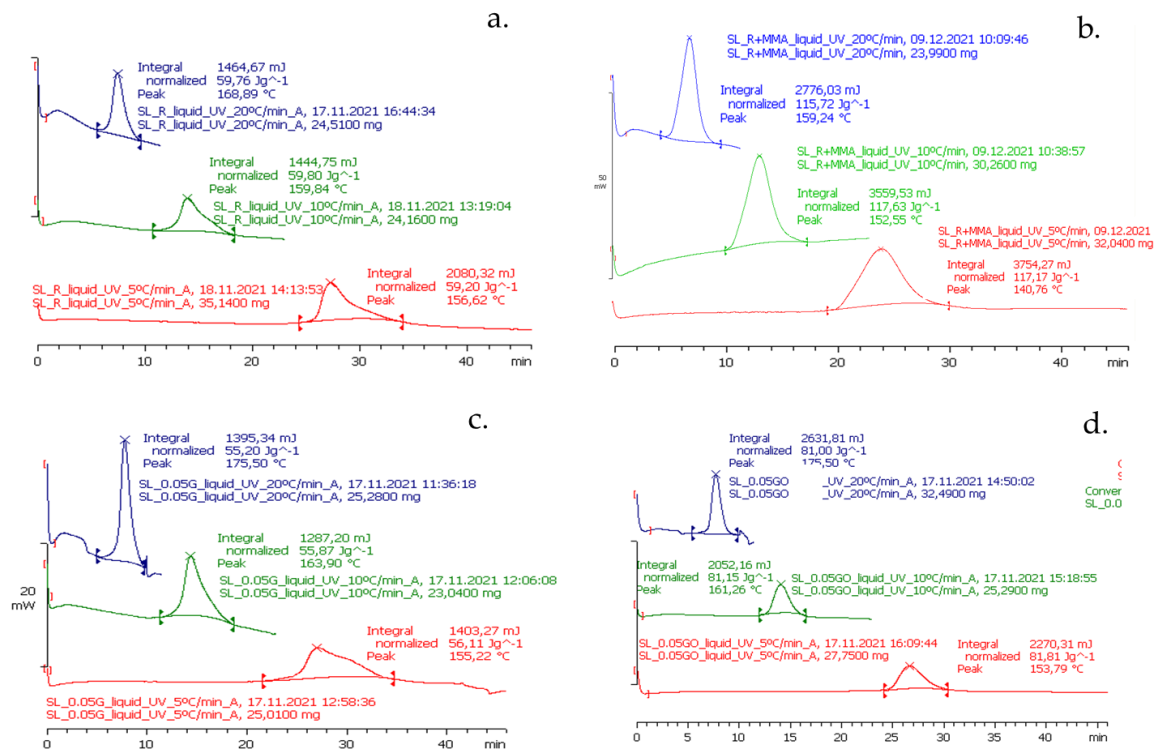

**Figure S2.** Thermograms of UV-triggered polymerization of R (a), R' (b), R'+G (c) and R'+GO (d)

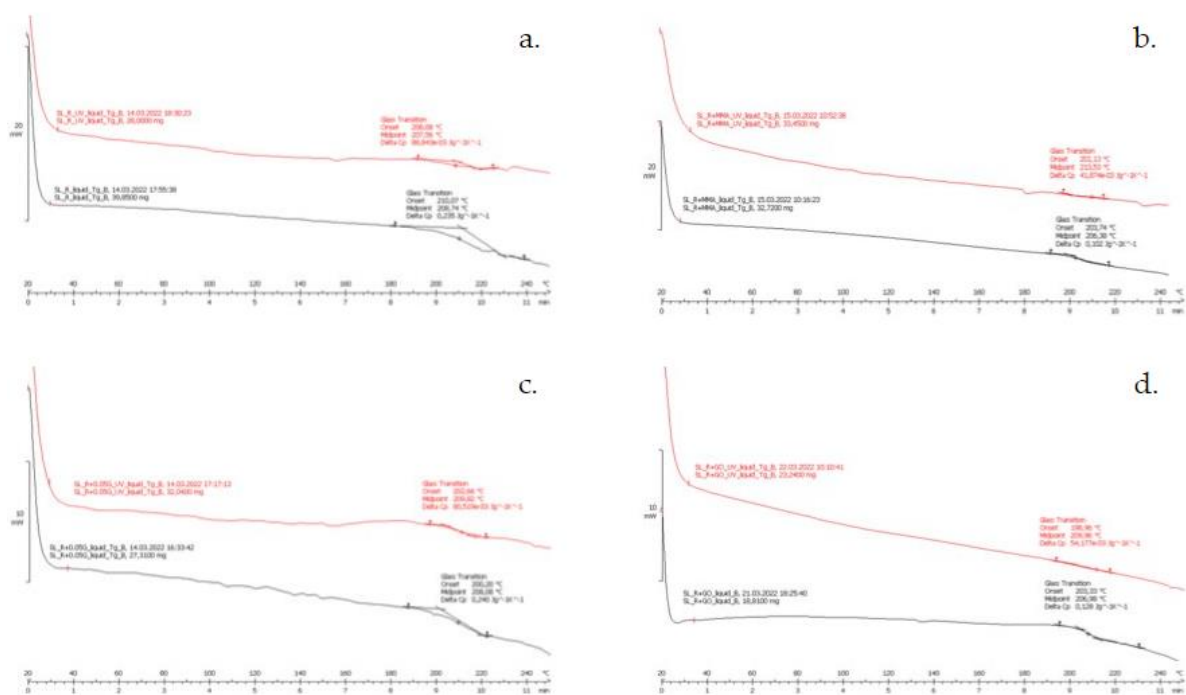

**Figure S3.** Second scan of UV- (red) and thermally- (black) triggered polymerized samples
